# Supplementary material for: Prehospital lactate improves prediction of the need for immediate interventions for hemorrhage after trauma
Source: PubMed Central journal article supplement (PMC6760524; doi:10.1038/s41598-019-50253-6), 2019-09-24

**Prehospital lactate improves prediction of the need for immediate interventions  
for hemorrhage after trauma**

Hiroshi Fukuma, Taka-aki Nakada, Tadanaga Shimada, Takashi Shimazui, Tuerxun  
Aizimu, Shota Naka, Hiroaki Watanabe, Yasuaki Mizushima, Tetsuya Matsuoka

*Supplemental Digital Content*

**Table E1. Baseline patient characteristics and clinical outcomes in cohort 2**

| Characteristics or outcomes             | Case <sup>a</sup> (n=20) | Control (n=65)      | P-values |
|-----------------------------------------|--------------------------|---------------------|----------|
| Age, years                              | 56 (42-63)               | 42 (22-59)          | 0.034    |
| Male, n (%)                             | 13 (65.0)                | 59 (90.8)           | 0.010    |
| Mechanism of injury                     |                          |                     |          |
| Penetrating, n (%)                      | 2 (10.0)                 | 0 (0.0)             | 0.053    |
| Blunt, n (%)                            | 18 (90.0)                | 65 (100.0)          | 0.69     |
| Road injury, n (%)                      | 14 (70.0)                | 53 (81.5)           |          |
| Fall, n (%)                             | 4 (20.0)                 | 10 (15.4)           |          |
| Compression machinery, n (%)            | 0 (0.0)                  | 2 (3.1)             |          |
| Other, n (%)                            | 0 (0.0)                  | 0 (0.0)             |          |
| Physiological data <sup>b</sup>         |                          |                     |          |
| Systolic blood pressure, mm Hg          | 121 (73-134)             | 138 (119-155)       | 0.0018   |
| Heart rate, beats/min                   | 91 (76-112)              | 82 (72-90)          | 0.10     |
| Respiratory rate, breaths/min           | 24 (14-30)               | 20 (18-25)          | 0.50     |
| Glasgow Coma Scale                      | 8 (5-13)                 | 14 (14-15)          | <0.0001  |
| Shock index                             | 0.79 (0.64-1.20)         | 0.59 (0.53-0.76)    | 0.0018   |
| Lactate                                 |                          |                     |          |
| Scene, mg/dL                            | 3.2 (2.2-5.2)            | 1.7 (1.2-2.6)       | <0.0001  |
| Emergency room, mg/dL                   | 3.8 (2.2-7.1)            | 1.9 (1.1-2.4)       | <0.0001  |
| Delta <sup>†</sup> , delta/min          | -0.015 (-0.066-0.081)    | 0.00 (-0.013-0.014) | 0.75     |
| Scene to hospital, min                  | 21 (14-26)               | 18 (15-24)          | 0.83     |
| Injury severity score                   | 32 (22-42)               | 5 (1-14)            | <0.0001  |
| Positive FAST exam <sup>‡</sup> , n (%) | 4 (20.0)                 | 0 (0.0)             | 0.0024   |
| Blood transfusion, n (%)                | 20 (100.0)               | -                   | -        |
| Red blood cell <sup>§</sup> , mL        | 280 (0-840)              | -                   | -        |
| Fresh frozen plasma <sup>¶</sup> , mL   | 1080 (720-1680)          | -                   | -        |
| Massive transfusion, n (%)              | 6                        | -                   | -        |
| Hemostatic intervention                 |                          |                     |          |
| Surgery, n (%)                          | 4 (20.0)                 | -                   | -        |
| IVR, n (%)                              | 5 (25.0)                 | -                   | -        |
| Both, n (%)                             | 1 (5.0)                  | -                   | -        |
| ICU admission, n (%)                    | 20 (100.0)               | 62 (95.4)           | 1.00     |
| Length of ICU stay (days)               | 10 (8-16)                | 2 (2-3)             | <0.0001  |
| 28-day mortality, n (%)                 | 3 (15.0)                 | 1 (1.5)             | 0.038    |

IVR, interventional radiology; ICU, intensive care unit; FAST, focused assessment with sonography in trauma.

<sup>a</sup> Cases were defined as patients who required blood transfusion or hemostatic intervention. <sup>b</sup> Data for lactate were obtained at the scene. <sup>†</sup> Delta value for lactate was calculated using the following formula: (lactate in the emergency room - lactate at the scene)/time from scene to hospital. <sup>‡</sup> Examination was performed at the scene. <sup>§</sup> Total volume within 24 h of emergency room arrival. <sup>¶</sup> Transfusion with  $\geq 10$  units of packed red blood cells.

Data are presented as median and interquartile range for continuous variables. *P* values were calculated using Pearson's chi-square test, Fisher's exact test, or the Mann-Whitney *U* test.

**Table E2. Baseline patient characteristics and clinical outcomes in cohort 1 + 2**

| Characteristics or outcomes     | Massive transfusion <sup>a</sup> (n=34) | Control (n=401)  | <i>P</i> -values |
|---------------------------------|-----------------------------------------|------------------|------------------|
| Age, years                      | 64 (45-77)                              | 42 (23-59)       | <0.0001          |
| Male, n (%)                     | 20 (58.8)                               | 282 (70.3)       | 0.162            |
| Mechanism of injury             |                                         |                  |                  |
| Penetrating, n (%)              | 0 (0)                                   | 12 (3.0)         | 0.301            |
| Blunt, n (%)                    | 34 (100)                                | 389 (97.0)       | 0.298            |
| Road injury, n (%)              | 26 (76.5)                               | 322 (80.3)       |                  |
| Fall, n (%)                     | 7 (20.6)                                | 43 (10.7)        |                  |
| Compression machinery, n (%)    | 1 (2.9)                                 | 11 (2.7)         |                  |
| Other, n (%)                    | 0 (0)                                   | 13 (3.2)         |                  |
| Physiological data <sup>b</sup> |                                         |                  |                  |
| Systolic blood pressure, mm Hg  | 112 (74-141)                            | 132 (118-149)    | <0.0001          |
| Heart rate, beats/min           | 100 (81-126)                            | 85 (74-98)       | 0.01             |
| Respiratory rate, breaths/min   | 24 (12-30)                              | 21 (16-26)       | 0.97             |
| Glasgow Coma Scale              | 8 (4-13)                                | 14 (13-15)       | <0.0001          |
| Shock index                     | 0.98 (0.71-1.33)                        | 0.64 (0.54-0.77) | 0.0001           |
| Lactate                         |                                         |                  |                  |
| Scene, mg/dL                    | 4.0 (2.6-5.2)                           | 2.1 (1.6-2.8)    | <0.0001          |
| Emergency room, mg/dL           | 4.0 (2.9-8.7)                           | 1.9 (1.3-2.8)    | <0.0001          |
| Delta <sup>†</sup> , delta/min  | 0.7 (-0.1-2.7)                          | -0.1 (-0.5-0.4)  | 0.004            |
| Scene to hospital, min          | 18 (14-24)                              | 18 (14-26)       | 0.164            |
| Injury severity score           | 34 (26-45)                              | 10 (2-21)        | <0.0001          |
| Hemostatic intervention         |                                         |                  |                  |
| Surgery, n (%)                  | 5 (14.7)                                | 9 (2.2)          | <0.0001          |
| IVR, n (%)                      | 13 (38.2)                               | 20 (5.0)         | <0.0001          |
| Both, n (%)                     | 5 (14.7)                                | 1 (5.0)          | <0.0001          |
| ICU admission, n (%)            | 33 (97.1)                               | 373 (93.0)       | 0.364            |
| Length of ICU stay (days)       | 17 (6-23)                               | 2 (2-5)          | <0.0001          |
| 28-day mortality, n (%)         | 9 (26.5)                                | 5 (1.2)          | <0.0001          |

IVR, interventional radiology; ICU, intensive care unit

<sup>a</sup>Transfusion with  $\geq 10$  units of packed red blood cells. <sup>b</sup>Data for lactate were obtained at the scene. <sup>†</sup> Delta value for lactate was calculated with the following formula: (lactate in the emergency room - lactate at the scene)/time from scene to hospital.

Data are presented as median and interquartile range for continuous variables. *P* values were calculated using Pearson's chi-square test, Fisher's exact test, or the Mann-Whitney *U* test.

**Figure E1. Patient flow diagram**

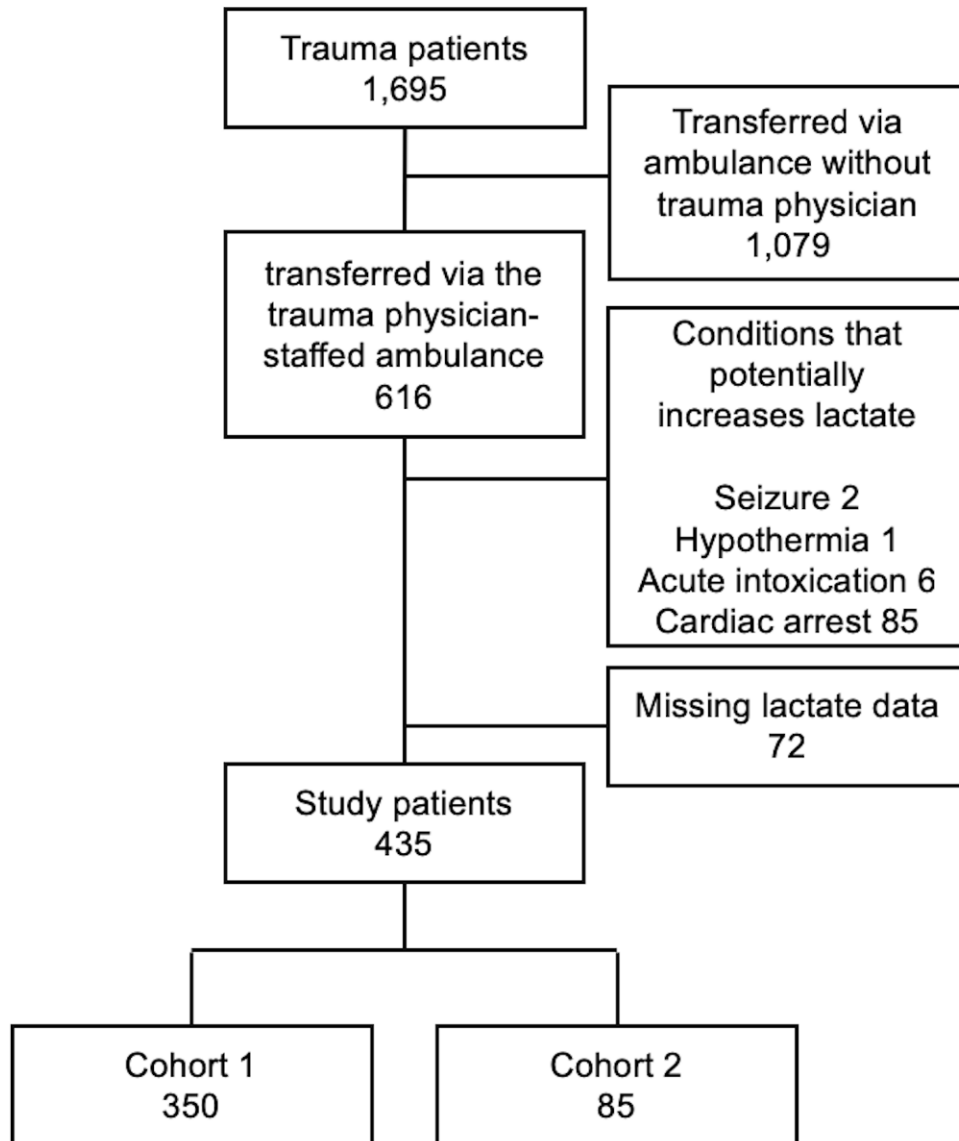

Supplement: 41598_2019_50253_MOESM1_ESM.pdf [file 41598_2019_50253_MOESM1_ESM.pdf]
